# Supplementary material
Source: Springer Nature journal article supplement (https://www.springermedizin.de/resource/supplementary/12891_2014_2118_MOESM2_ESM.pdf/9509484)

**Safety evaluable population**

**Faster infusion evaluable population**

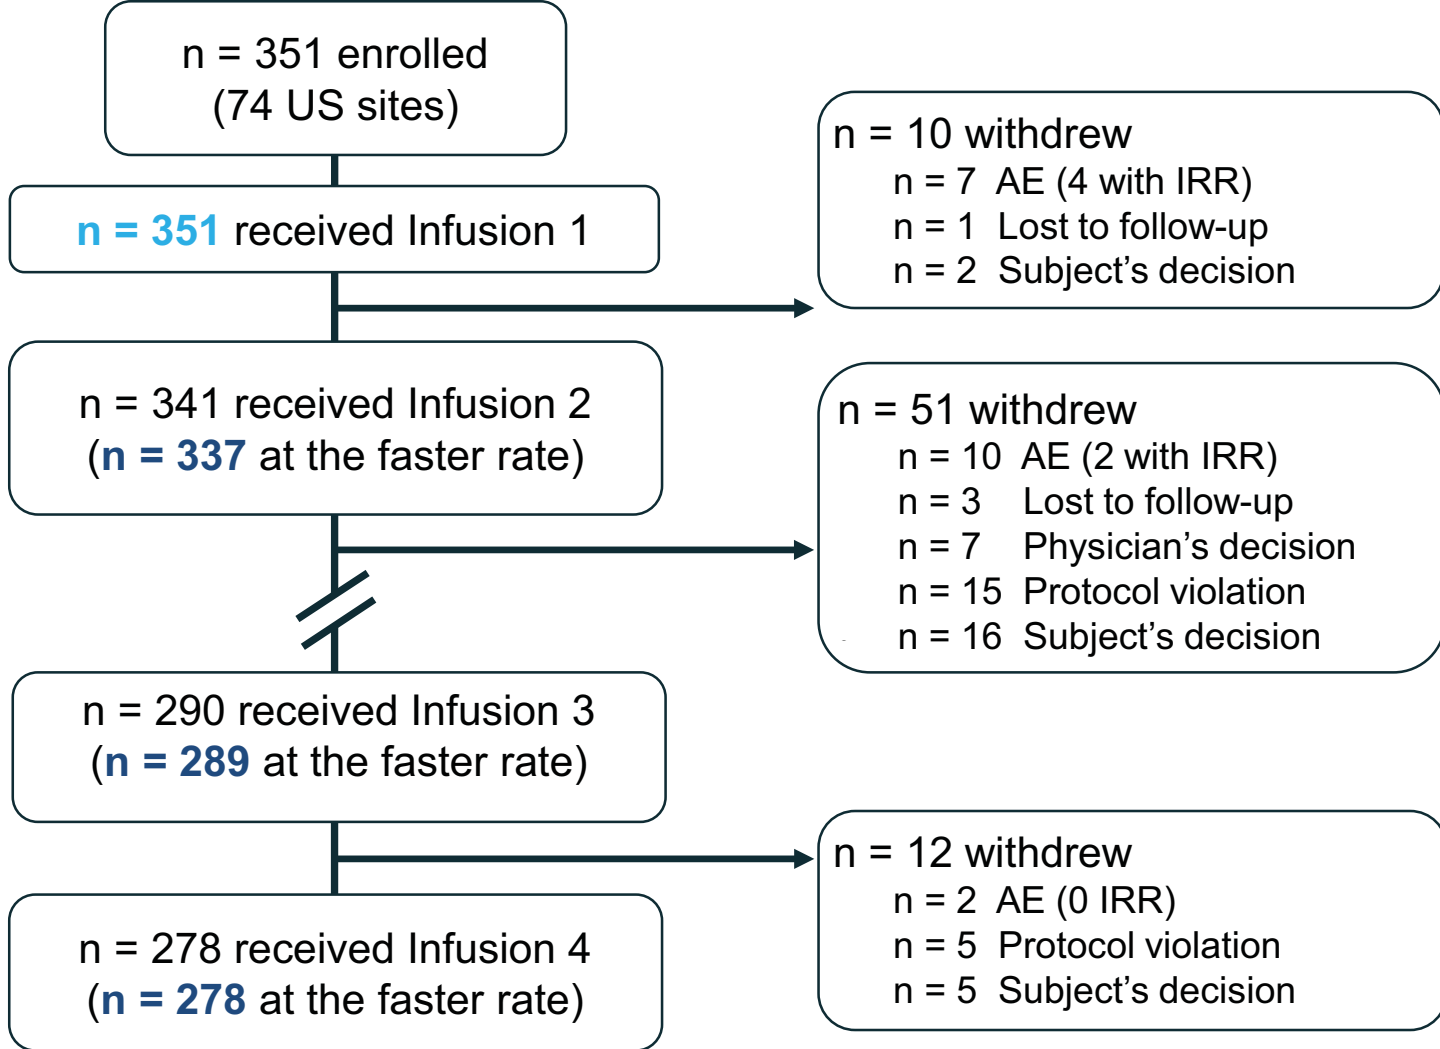

Supplement: MOESM2 [file 9509484]
